# Supplementary material for: Transcriptional responses of ecologically diverse Drosophila species to larval diets differing in relative sugar and protein ratios
Source: PLoS One. 2017 Aug 23;12(8):e0183007. doi: 10.1371/journal.pone.0183007 (PMC5568408; doi:10.1371/journal.pone.0183007)
Supplement: S5 Table — Excel file that contains the sequences of each set of primers used to make the RT-qPCRs for validation of RNA-Seq data. (XLSX) [file pone.0183007.s005.xlsx]

## Sheet: Sequences
Sequences of primers used for RT-qPCRs.
Primers used for RT-qPCR in D. arizonae and D. mojavensis
Darz_Gene_ID	Dmoj_Gene_Symbol	Dmoj_Gene_short_name	Dmel_ortholog	Forward primer	Reverse primer
XLOC_001916	FBgn0012566	Dmoj\Adh1	Dmel\Adh	TCTGCAGAAAATCTTTGACCAGCTT	ATTTGTGGAGCAGAGGTGTCTTTG
XLOC_001917	FBgn0012567	Dmoj\Adh2	Dmel\Adh	ATTGAAGACGATCTTCGACAAGCTG	ACTTGTGGACCAGAGTTGTCTTCG
XLOC_012803	FBgn0064059	Dmoj\Xdh	Dmel\ry	GCCTGCGAGATTGAGTGCTACA	GAAAGGCCGTATTCGAGGGCAG
XLOC_007196	FBgn0068806	Dmoj\G6pd	Dmel\Zw	CGCGCTCCAAGATGACAGTGGA	TGCTGGTTGAGCGCCTGGTA
XLOC_008841	FBgn0134299	Dmoj\GI11539	Dmel\Fbp1	CGTGTCCGCTGGTCGCATTGTC	CTTCTGGCGCAGCAAGTCCTCC
XLOC_000655	FBgn0138311	Dmoj\GI15562	Dmel\CG10962	CCCAGCAAATTCGCCTTGACCG	GCACTATCTCCGTGGACACCCA
XLOC_011578	FBgn0143688	Dmoj\GI20954	Dmel\CG17323	CGTGCTGCTGCACTACGAGGAC	GTGAGCCACATGCTCCACCCAC
XLOC_000511	FBgn0144238	Dmoj\GI21508	Dmel\CG8745	CTTCTTCGTCAACTCCGGCTCGG	GTGCACGTAGTCCGGCTTCTTGG
XLOC_008657	FBgn0146169	Dmoj\GI23443	Dmel\CG6415	GCAAGGCGGCATTCTCGACG	ACCTGTGGCCCCTGAACTGC
XLOC_005117	FBgn0146631	Dmoj\GI23906	Dmel\CG11892	TGCCCAAGCTGAAGGCTCTGC	GACGCCGTTCTCGCGCTCAT
Primers used for RT-qPCR only in D. mojavensis
Dmoj_Gene_ID	Dmoj_Gene_Symbol	Dmel_ortholog	Forward primer	Reverse primer
FBgn0137747	Dmoj\GI14996	Dmel\Thor	CAAAGACGTAGTACGGAGAACATAG	CTTTCCGTTATTTTATTACAGTTGCAC
FBgn0137757	Dmoj\GI15007	Dmel\Thor	CGAACTAGGAACGTAGGAGAAAGG	ACTTTTAGTTTGTAGTAATAACGGTTG
FBgn0142712	Dmoj\GI19975	Dmel\sug	CAGCGATCAAAGCGGCAGCAG	GCTTCTCCTTGGTGTGGGTGC
FBgn0143512	Dmoj\GI20777	Dmel\Sec61β	GGCACTGGTGGTATGTGGCGTT	TGTGTAGCATGAAGACAGAGGCGA
FBgn0145801	Dmoj\GI23074	Dmel\Lsp1β	TCGAGATCGTCTACCGTGTGGAG	GGCAGCAGCGAATGAGCCTTGT
Primers used for RT-qPCR as internal control
Dmoj_Gene_ID	Dmoj_Gene_Symbol	Forward primer	Reverse primer
FBgn0253774	Dmoj\18SrRNA:GI25475	GGTCTGTGATGCCTTTAGATGTCC	GACCTCTCGGTCTAGGAAATACA

## Sheet: Primer efficiencies
Efficiencies of primers used for RT-qPCRs. Three technical replicates were used.
Target Name	slope	R2	Efficiency	Efficiency (%)
Dmoj\15562	-3.225	0.998	1.0421	104.21
Dmoj\21508	-3.296	0.999	1.01094	101.094
Dmoj\23443	-3.487	0.969	0.935439	93.5439
Dmoj\Adh1	-3.506	0.997	0.928525	92.8525
Dmoj\Adh2	-3.487	0.999	0.935439	93.5439
Dmoj\G6pd	-3.417	1	0.961798	96.1798
Dmoj\20954	-3.322	0.999	0.99997	99.997
Dmoj\23906	-3.382	0.999	0.975527	97.5527
Dmoj\Fbp1	-3.372	0.999	0.97952	97.952
Dmoj\Sec61B	-3.382	0.999	0.975527	97.5527
Dmoj\Thor1	-3.528	0.999	0.920643	92.0643
Dmoj\Thor2	-3.618	0.999	0.889713	88.9713
Dmoj\18SrRNA	-3.514	0.996	0.925644	92.5644
Dmoj\Lsp1B	-3.383	0.998	0.97513	97.513
Dmoj\Sug	-3.506	0.999	0.928525	92.8525
Dmoj\Xdh	-3.387	0.998	0.973543	97.3543
Ct mean*efificiencies with SD in samples of D. mojavensis. Three technical replicates were used.
Target Genes	Cт Mean*Efficiency				Standard Desviation (SD)
	Dmoj_S1_HPLS	Dmoj_S2_HPLS	Dmoj_S1_LPHS	Dmoj_S2_LPHS	Dmoj_S1_HPLS	Dmoj_S2_HPLS	Dmoj_S1_LPHS	Dmoj_S2_LPHS
Dmoj\GI15562	17.4144	17.5326	18.5974	18.2878	0.0907	0.0596	0.0773	0.1276
Dmoj\21508	21.5608	21.6834	19.1354	19.2769	0.0867	0.009	0.051	0.125
Dmoj\23443	18.2718	17.7275	19.365	19.3569	0.1141	0.0316	0.0143	0.0605
Dmoj\Adh1	15.5833	12.9189	16.3994	15.6909	0.1196	0.0362	0.0709	0.0642
Dmoj\Adh2	12.0588	9.0396	16.7026	13.3035	0.0317	0.0868	0.2001	0.0887
Dmoj\G6pd	19.964	18.9976	18.3472	16.7961	0.1147	0.1113	0.106	0.0771
Dmoj\20954	26.6295	26.4767	23.8746	24.5082	0.0624	0.0938	0.0331	0.0963
Dmoj\23906	19.3281	20.7832	20.7871	23.7525	0.1177	0.0947	0.0236	0.094
Dmoj\Fbp1	19.8196	17.9462	27.7764	19.2776	0.1065	0.1097	0.1337	0.1229
Dmoj\Sec61B	15.2233	13.9704	16.3636	16.3273	0.0903	0.0881	0.0906	0.1453
Dmoj\Thor1	17.5531	16.4217	16.4942	14.9742	0.0406	0.0601	0.0035	0.0406
Dmoj\Thor2	21.2968	18.696	19.8238	17.4219	0.0283	0.0297	0.1157	0.0989
Dmoj\18SrRNA	13.6259	14.6256	12.4876	13.9937	0.0874	0.0996	0.0551	0.1591
Dmoj\Lsp1B	8.8357	8.4054	12.5656	11.4738	0.1059	0.0797	0.0354	0.064
Dmoj\Sug	20.2989	19.2068	18.4748	18.064	0.0316	0.0659	0.0187	0.0632
Dmoj\Xdh	21.7642	22.2779	22.7072	22.6067	0.0408	0.0833	0.0619	0.0683
Ct mean*efificiencies with SD in samples of D. arizonae. Three technical replicates were used.
D. arizonae Target Genes	D. mojavensis Target Genes	Cт Mean*Efficiency				Standard Desviation (SD)
		Darz_S1_HPLS	Darz_S2_HPLS	Darz_S1_LPHS	Darz_S2_LPHS	Darz_S1_HPLS	Darz_S2_HPLS	Darz_S1_LPHS	Darz_S2_LPHS
XLOC_000655	Dmoj\15562	15.315	17.8734	18.2644	20.714	0.1082	0.1048	0.0519	0.0436
XLOC_000511	Dmoj\21508	20.0877	20.5385	17.9613	19.1078	0.0551	0.0262	0.0816	0.039
XLOC_001916	Dmoj\Adh1	16.1105	17.4361	15.686	16.6775	0.0658	0.0855	0.029	0.0171
XLOC_007196	Dmoj\G6pd	20.1042	20.0386	18.2289	17.6576	0.1033	0.0776	0.0525	0.0514
18SrRNA	Dmoj\18SrRNA	13.2322	14.5496	12.8774	13.2343	0.1321	0.1207	0.0281	0.0476
XLOC_011578	Dmoj\20954	26.088	24.5753	22.9595	22.4573	0.1451	0.095	0.1411	0.0524
XLOC_008657	Dmoj\23443	20.3586	20.4988	19.8576	19.9539	0.1007	0.0517	0.0588	0.031
XLOC_005117	Dmoj\23906	20.7516	18.4853	21.116	21.829	0.1297	0.0383	0.0652	0.0527
XLOC_001917	Dmoj\Adh2	12.642	12.773	16.2582	18.0169	0.088	0.0564	0.0893	0.1607
XLOC_008841	Dmoj\Fbp1	18.3213	15.2821	19.7881	19.1001	0.0434	0.0227	0.0446	0.0336
XLOC_012803	Dmoj\Xdh	22.055	22.4866	22.9298	23.281	0.0835	0.0421	0.0684	0.043
